# Supplementary material for: Effects of chronic consumption of specific fruit (berries, citrus and cherries) on CVD risk factors: a systematic review and meta-analysis of randomised controlled trials
Source: PubMed Central journal article supplement (PMC7900084; doi:10.1007/s00394-020-02299-w), 2020-06-13
Supplement: 394_2020_2299_MOESM1_ESM.pdf [file 394_2020_2299_MOESM1_ESM.pdf]

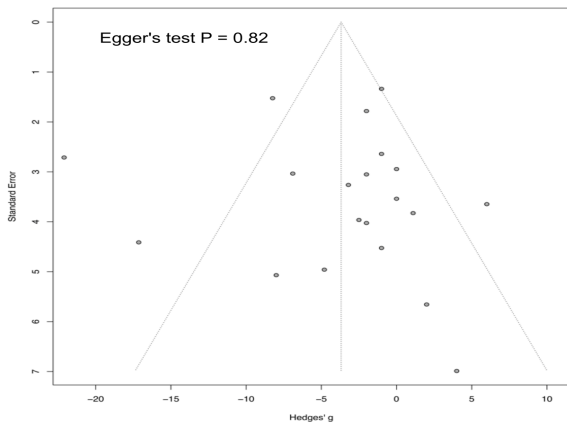

a. Funnel plot of investigated effect of berry group on SBP

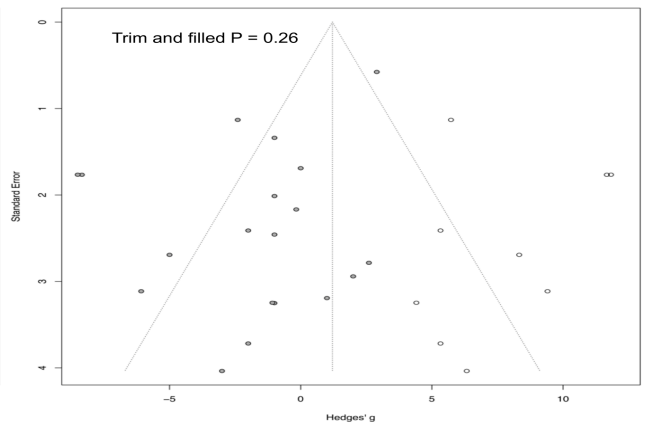

b. Funnel plot of investigated effect of berry group on DBP

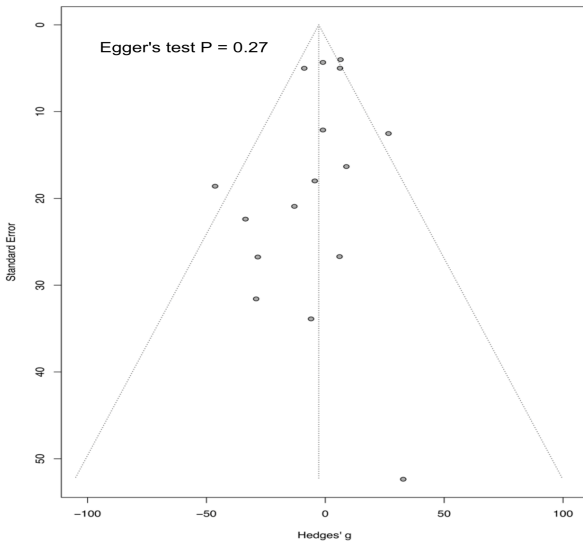

c. Funnel plot of investigated effect of berry group on TAG

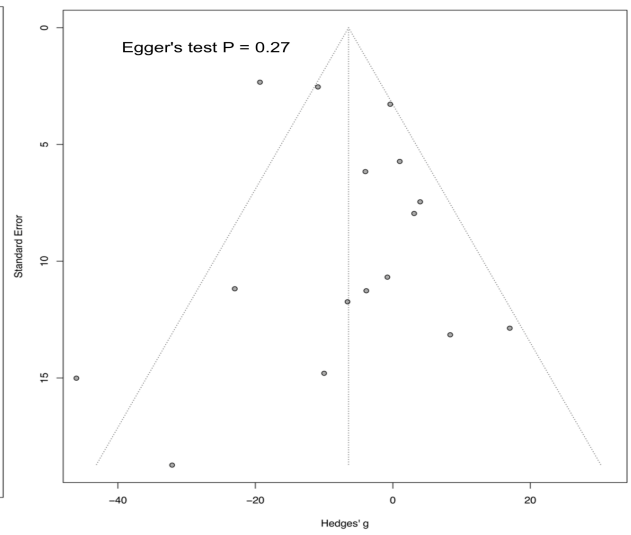

d. Funnel plot of investigated effect of berry group on TC

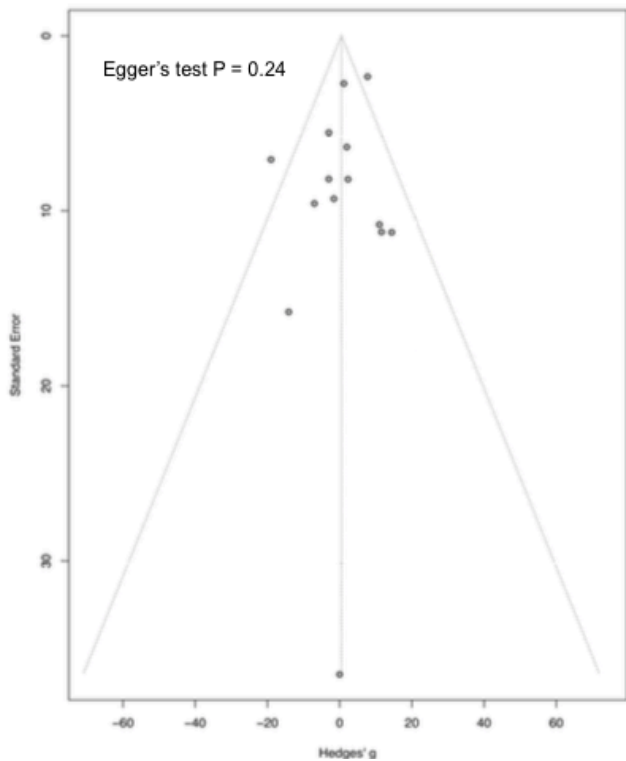

e. Funnel plot of investigated effect of berry group on LDL-C

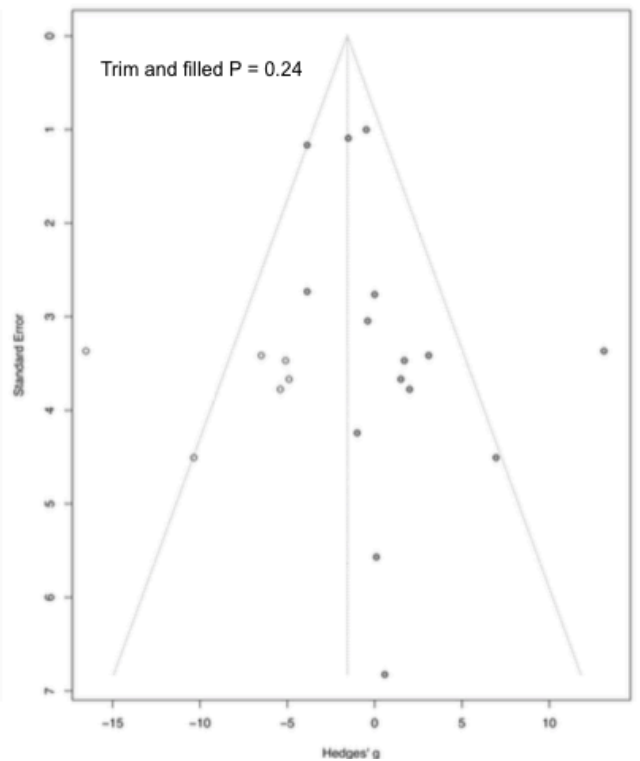

f. Funnel plot of investigated effect of berry group on HDL-C

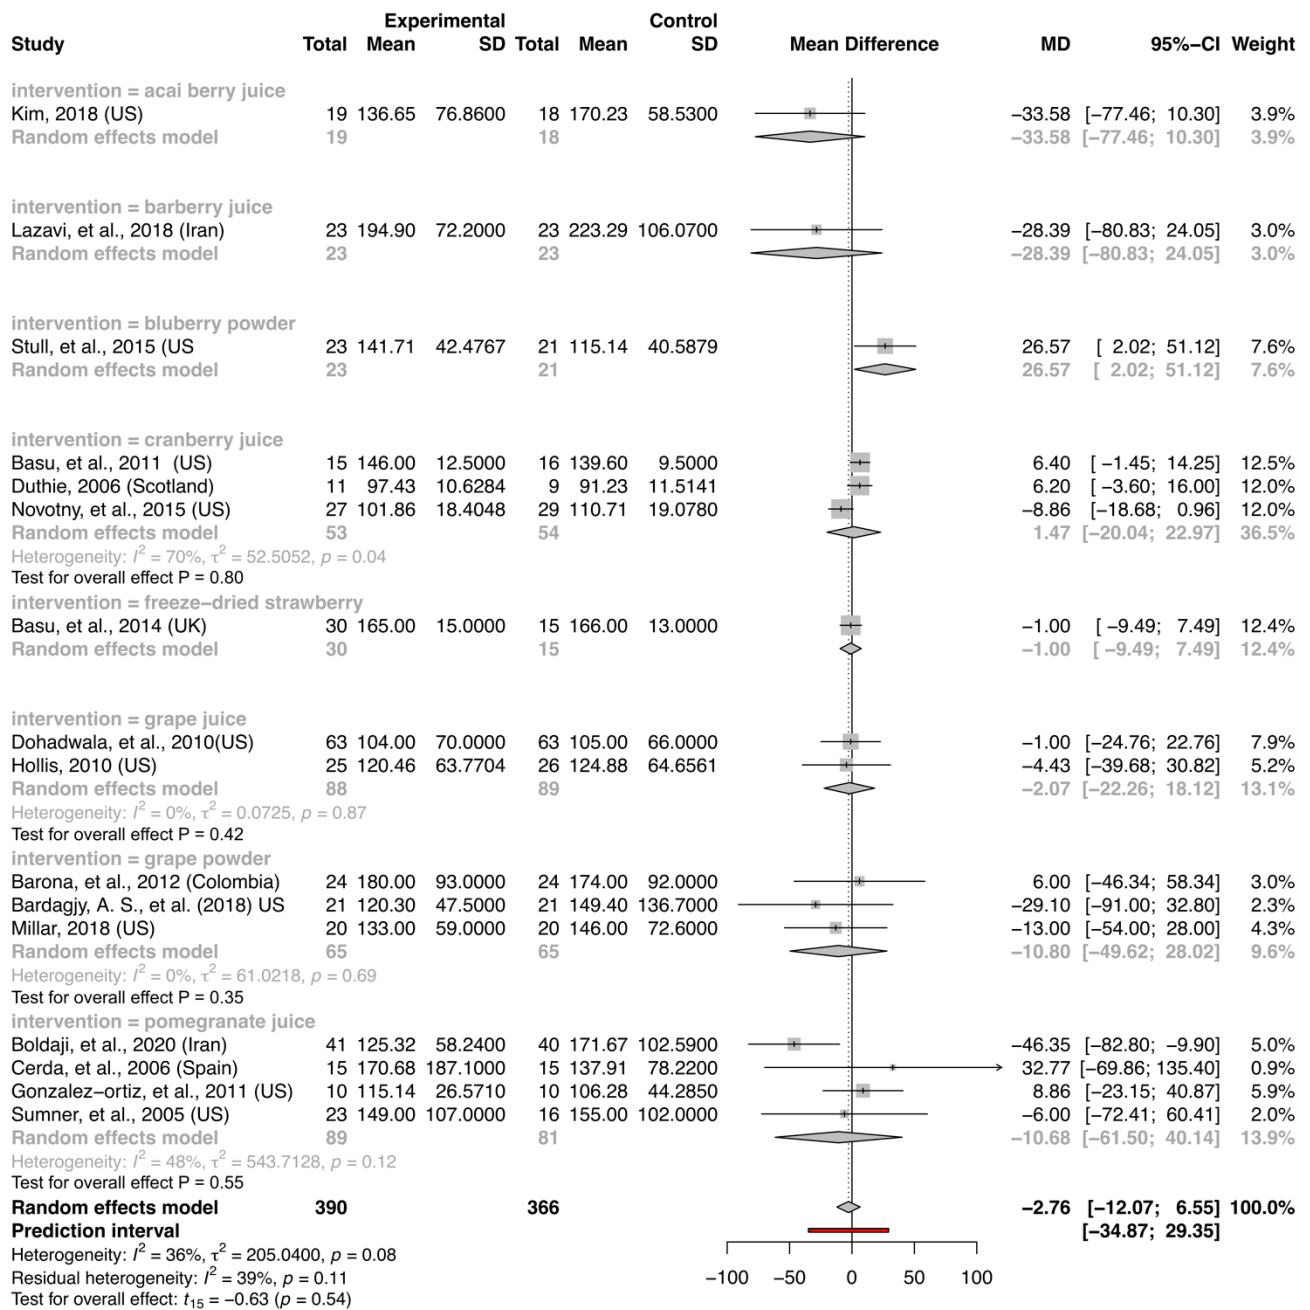

Supplemental Figure 2. The effect of the berry interventions on TAG

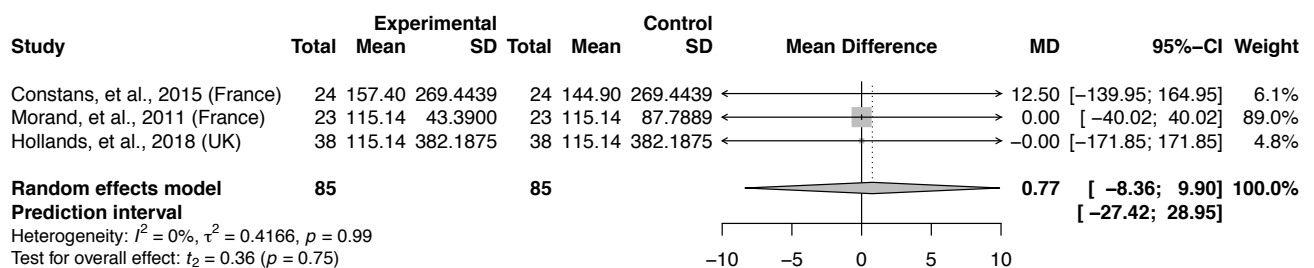

Supplemental Figure 3. The effect of orange juice interventions on TAG

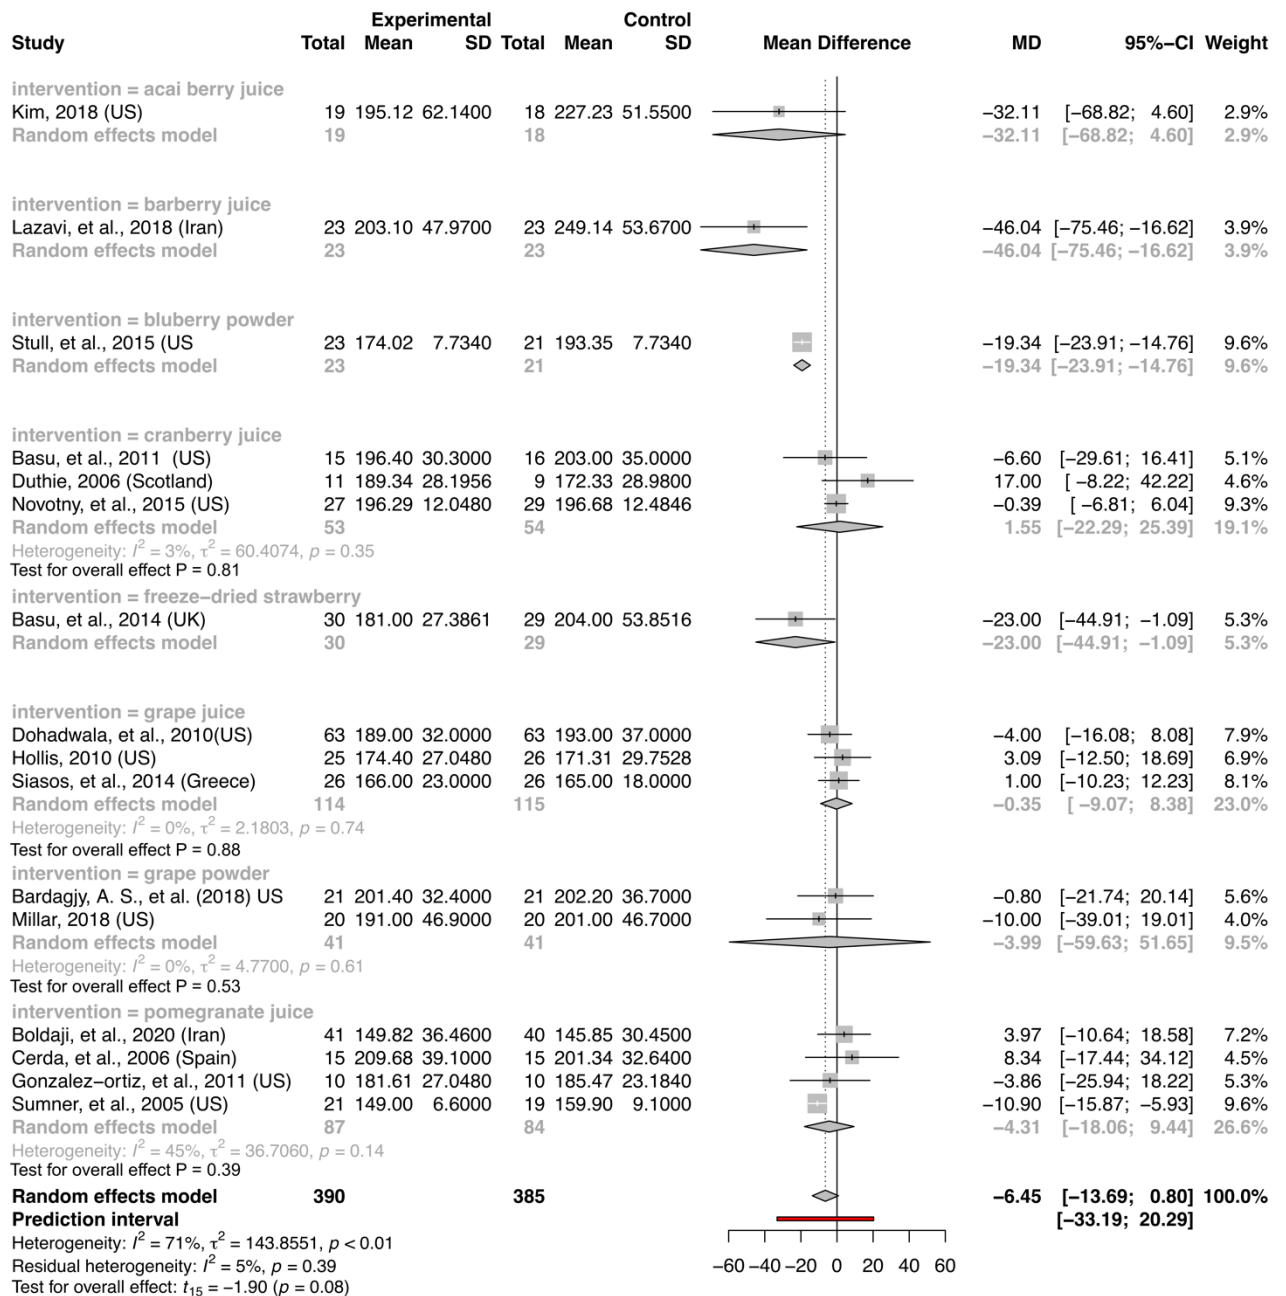

Supplemental Figure 4. The effect of the berry interventions on TAG

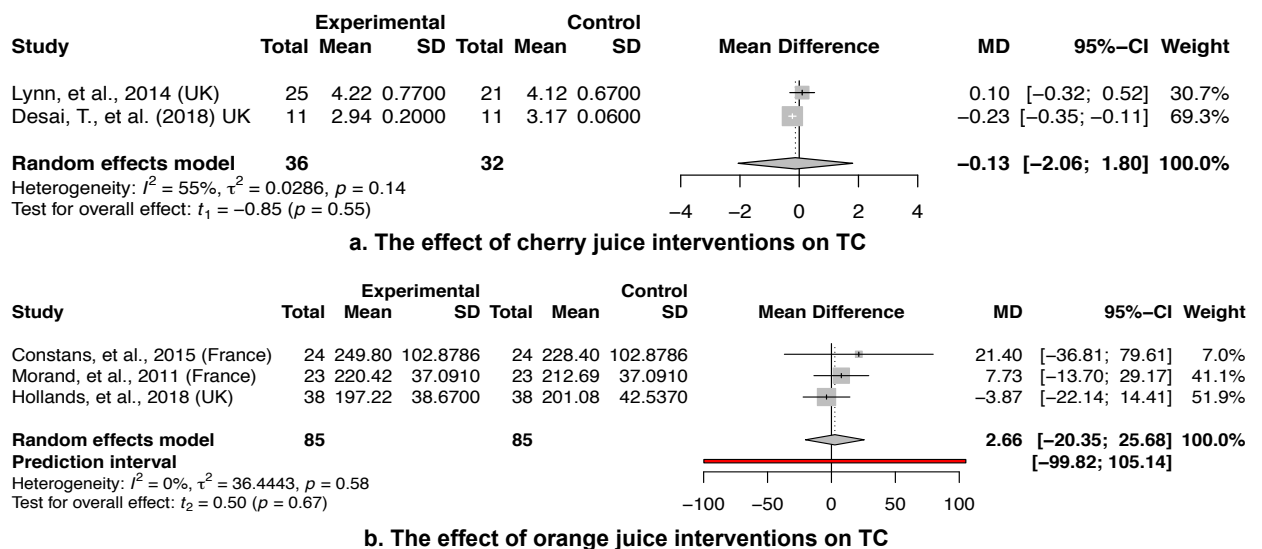

Supplemental Figure 5. The effect of cherry and orange juice interventions on TC

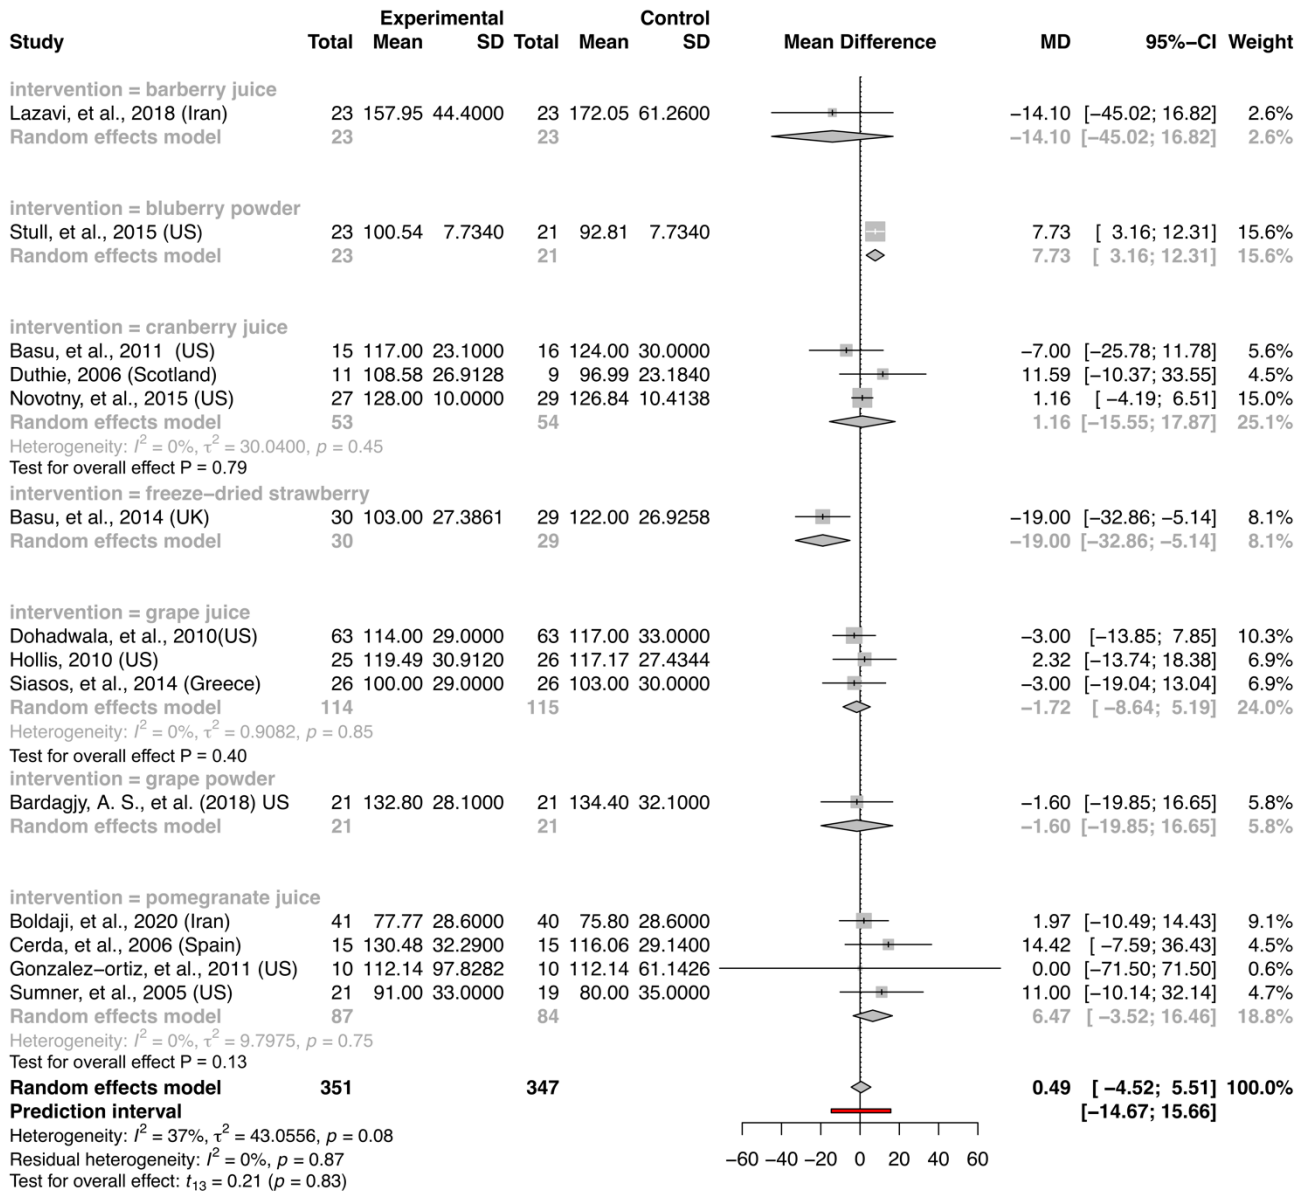

Supplemental Figure 6. The effect of the berry interventions on LDL-C

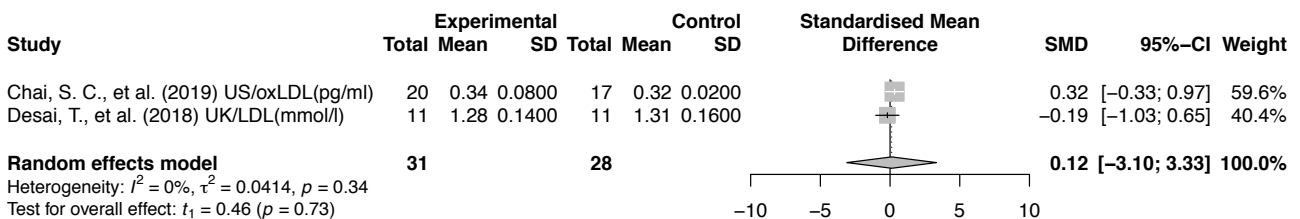

Supplemental Figure 7. The effect of cherry juice interventions on LDL-C

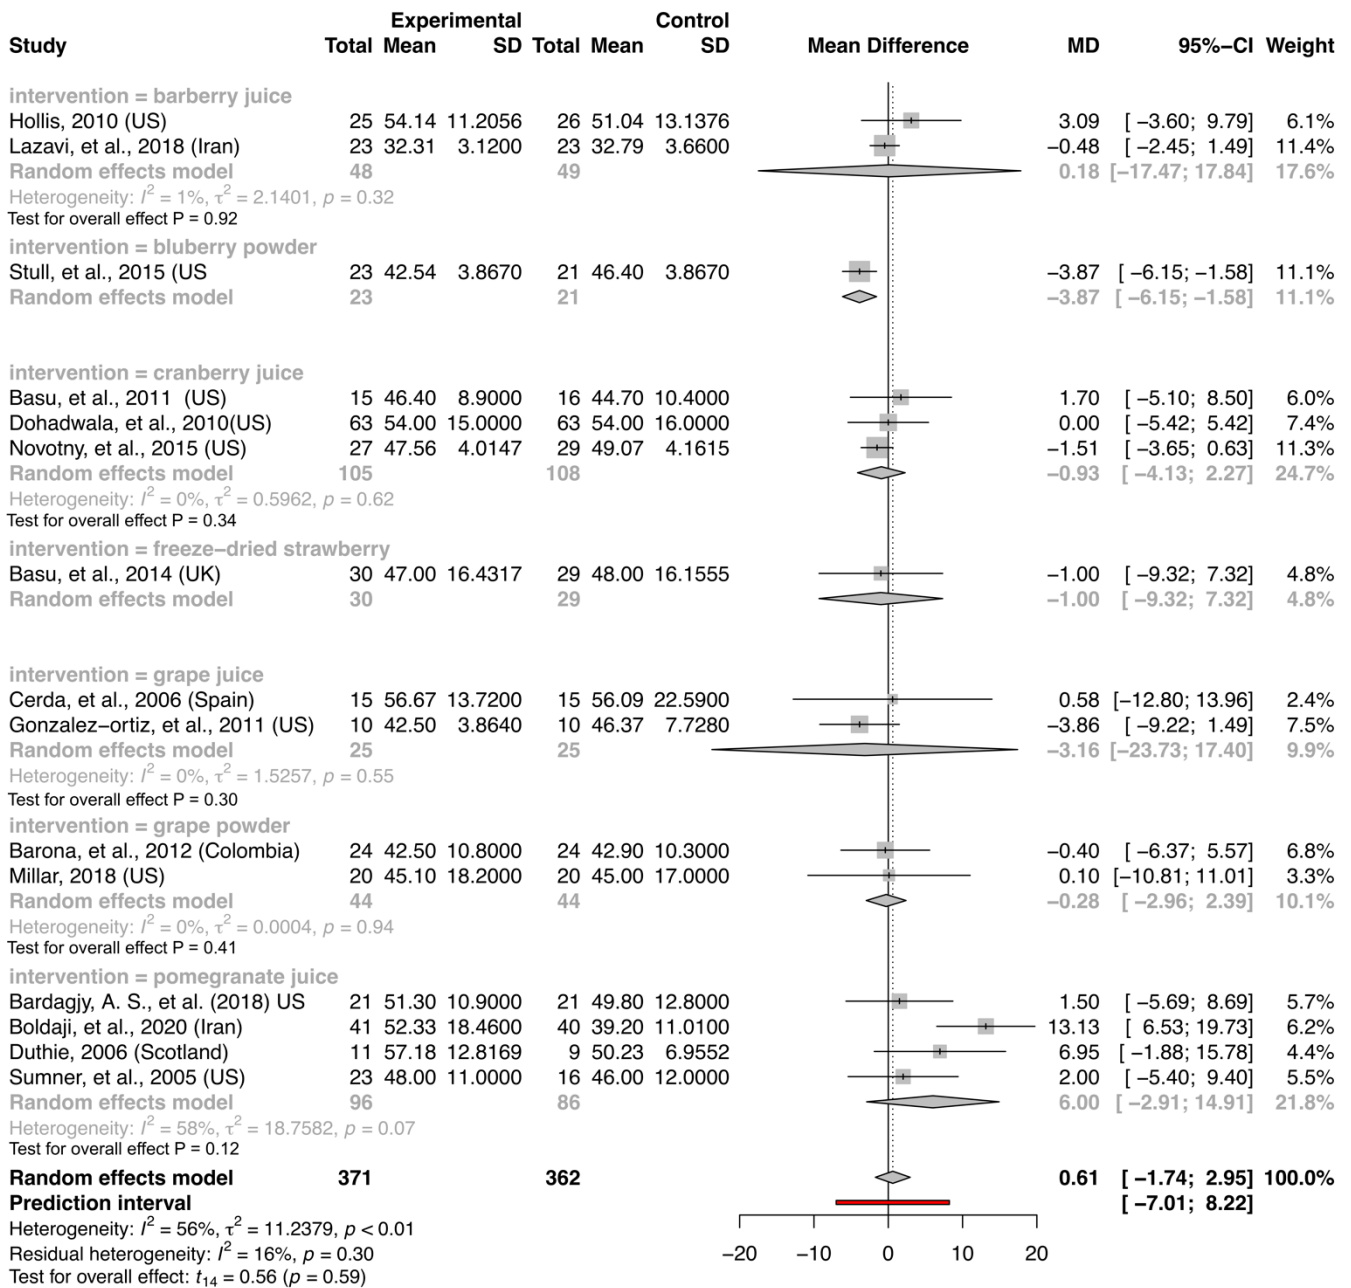

Supplemental Figure 8. The effect of the berry interventions on HDL-C

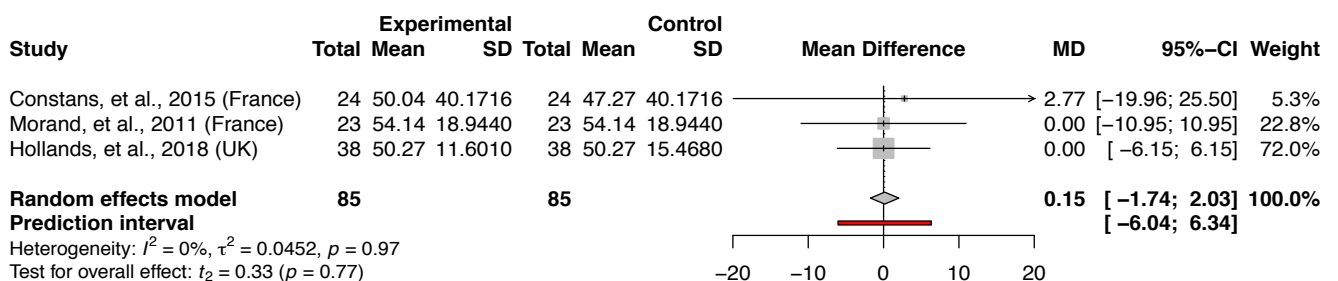

Supplemental Figure 9. The effect of orange juice interventions on HDL-C

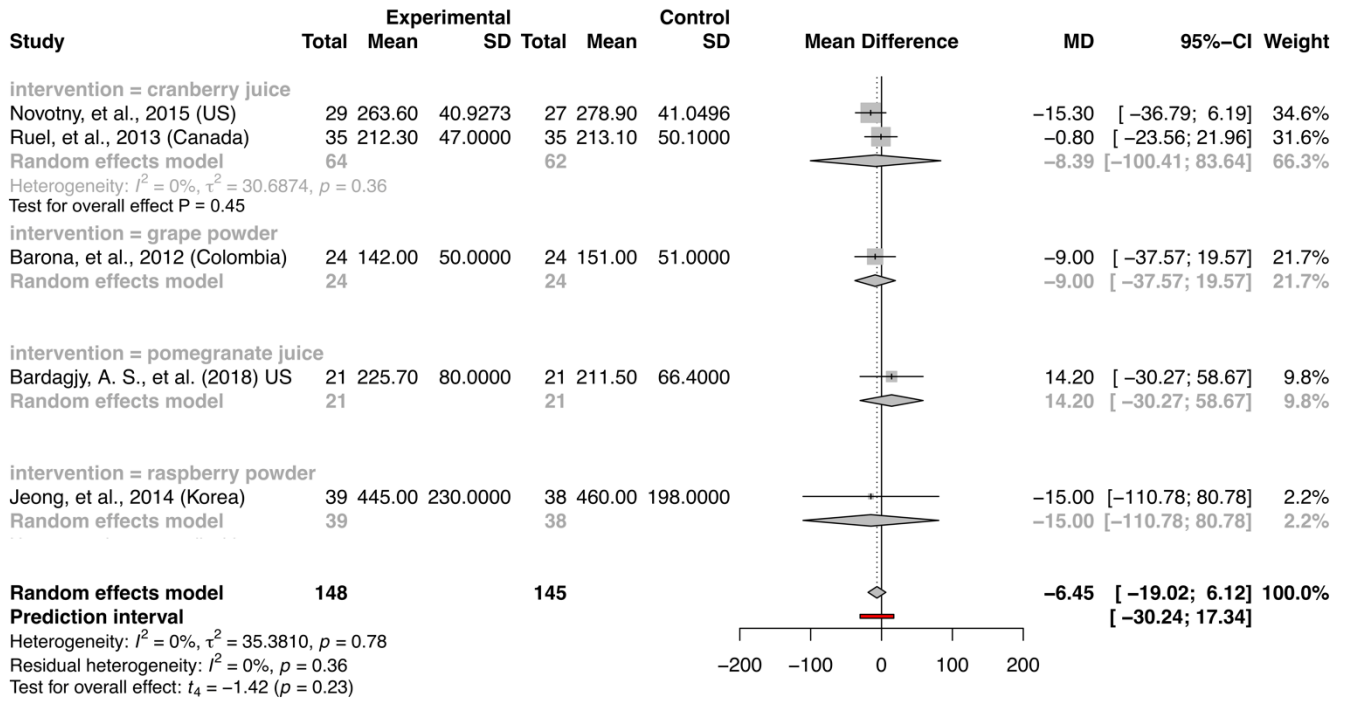

Supplemental Figure 10. The effect of the berry interventions on ICAM

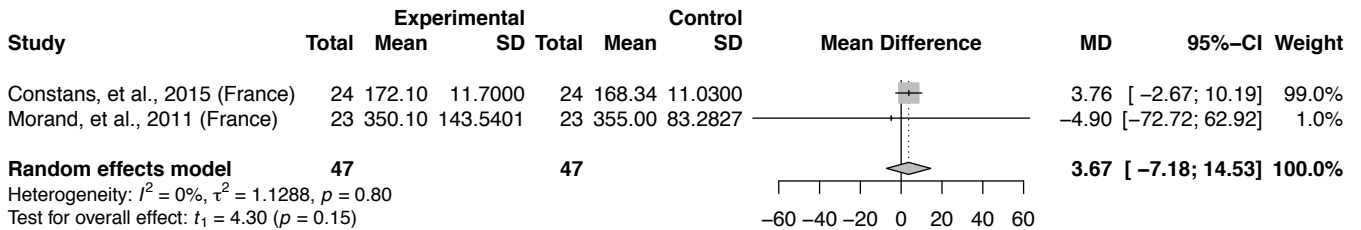

Supplemental Figure 11. The effect of orange juice interventions on ICAM



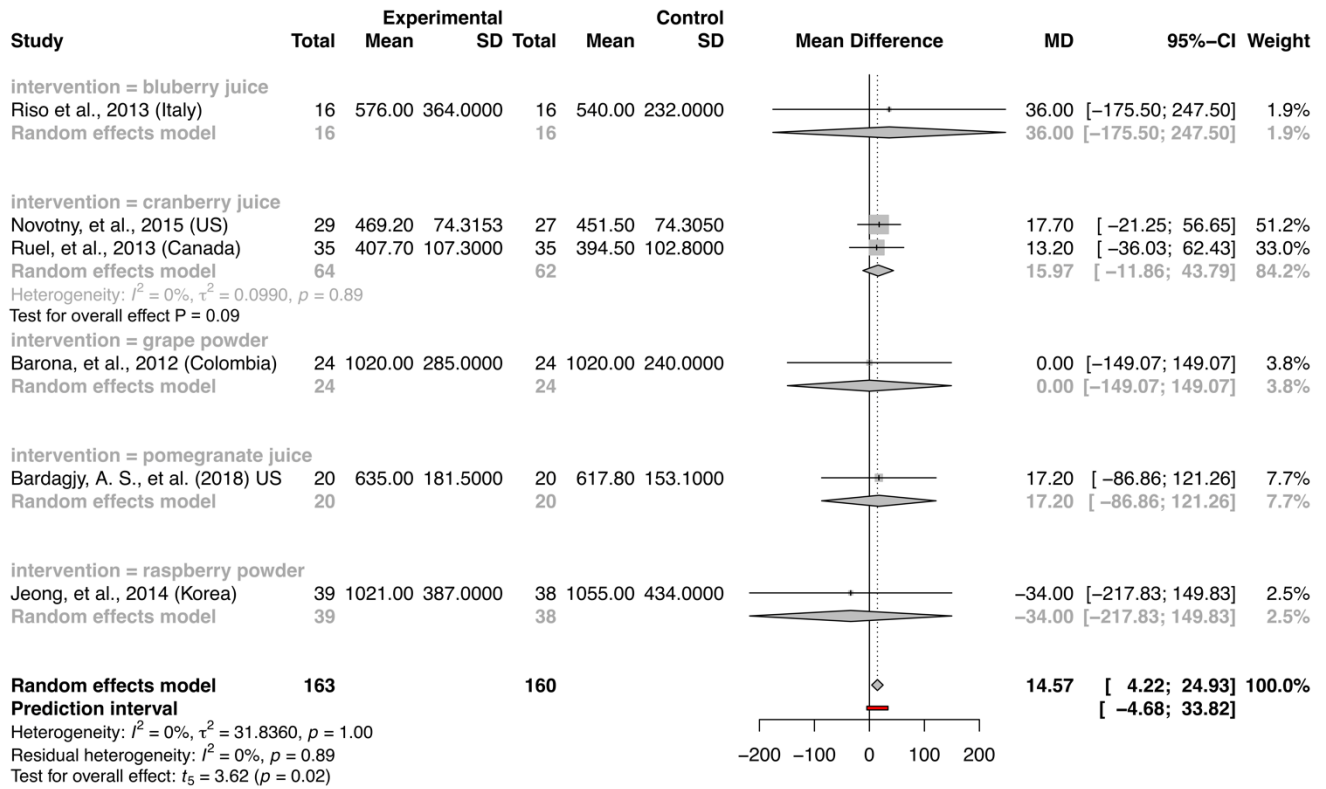

Supplemental Figure 12. The effect of the berry interventions on VCAM

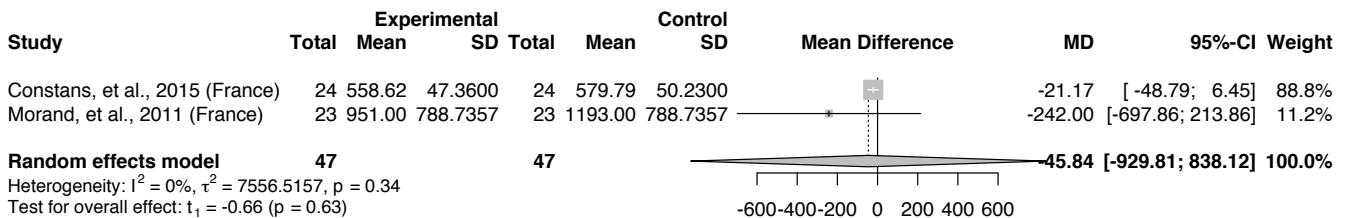

Supplemental Figure 13. The effect of orange juice interventions on VCAM

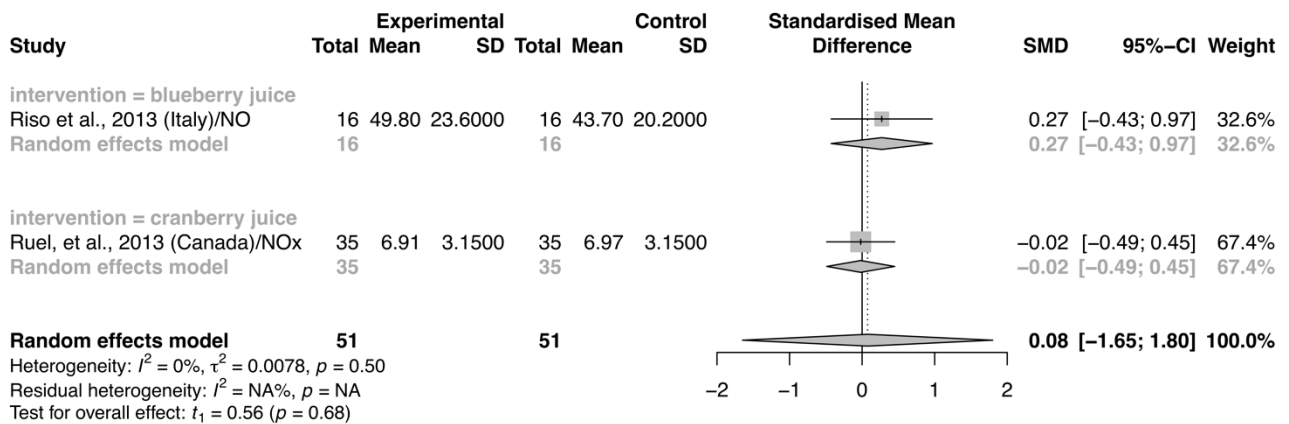

Supplemental Figure 14. The effect of the berry interventions on NO

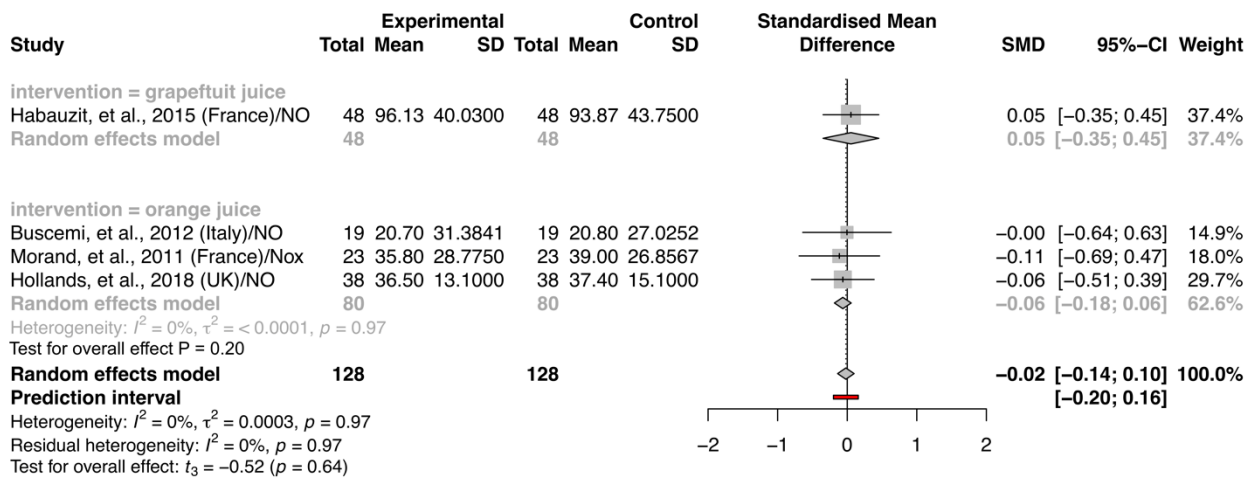

Supplemental Figure 15. The effect of citrus juice interventions on NO

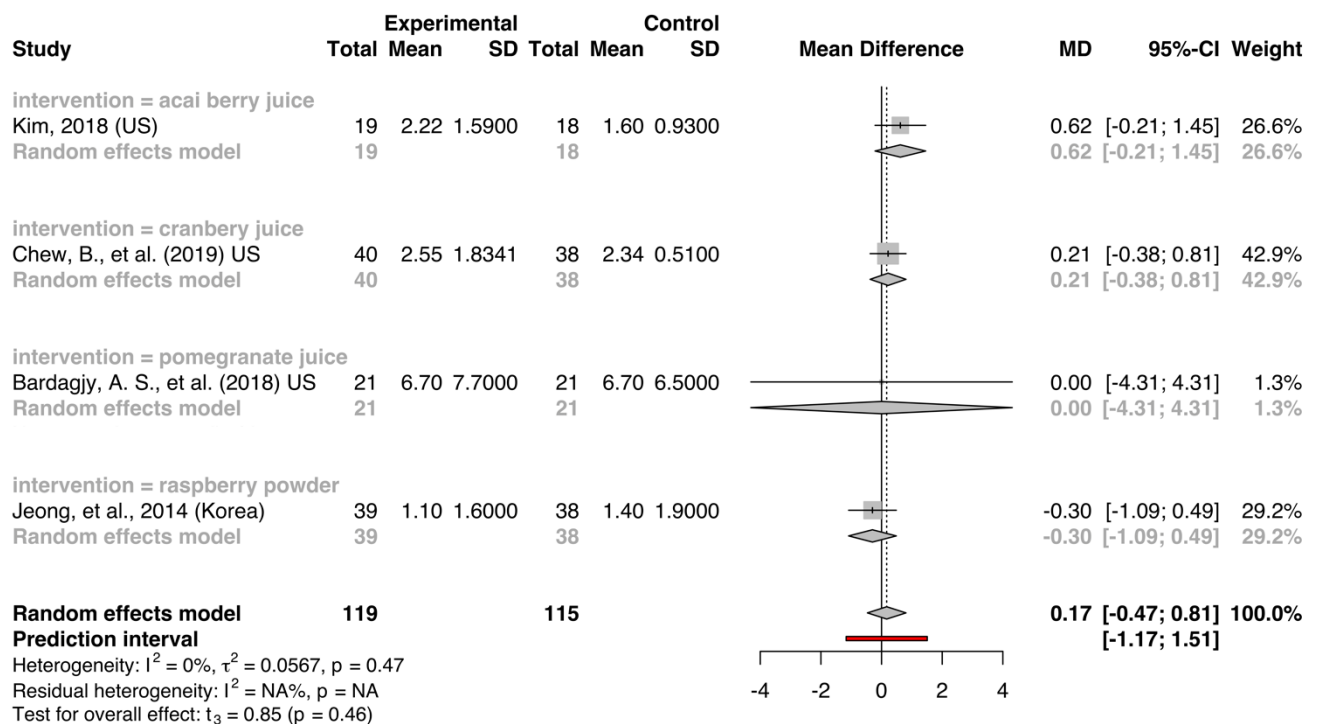

Supplemental Figure 16. The effect of the berry interventions on hsCRP

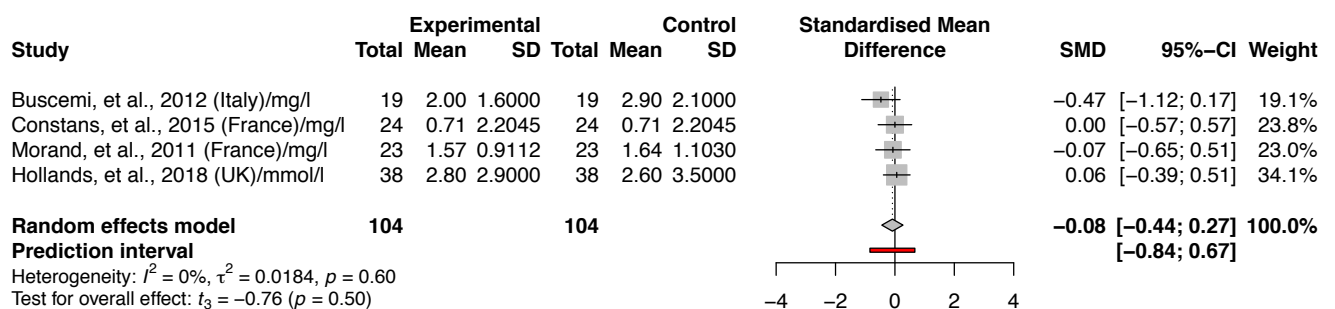

Supplemental Figure 17. The effect of orange juice interventions on hsCRP
