# Supplementary material for: Effects of chronic consumption of specific fruit (berries, citrus and cherries) on CVD risk factors: a systematic review and meta-analysis of randomised controlled trials
Source: PubMed Central journal article supplement (PMC7900084; doi:10.1007/s00394-020-02299-w), 2020-06-13
Supplement: 394_2020_2299_MOESM7_ESM.pdf [file 394_2020_2299_MOESM7_ESM.pdf]

**Supplemental Table 6. Sensitivity analysis of studies with and without juice concentrate supplementation.**

|                                   | Cherry juice assessing SBP |                          |                      |                     | Cherry juice assessing DBP |                          |                      |                     | Citrus juice assessing SBP |                          |                      |                     |
|-----------------------------------|----------------------------|--------------------------|----------------------|---------------------|----------------------------|--------------------------|----------------------|---------------------|----------------------------|--------------------------|----------------------|---------------------|
|                                   | N                          | Mean difference (95% CI) | P for overall effect | P for heterogeneity | N                          | Mean difference (95% CI) | P for overall effect | P for heterogeneity | N                          | Mean difference (95% CI) | P for overall effect | P for heterogeneity |
| All studies                       | 2                          | -3.11 [-4.06; -2.15]     | 0.02                 | 0.98                | 2                          | -0.51 [-4.45; 3.43]      | 0.35                 | 0.9                 | 3                          | 0.83 [-6.14; 7.81]       | 0.66                 | 0.52                |
| Without juice concentrate studies | 1                          | -3.00 [-13.03; 7.03]     | NA                   | NA                  | 1                          | 0.00 [-8.36; 8.36]       | NA                   | NA                  | 2                          | 0.76 [-36.61; 38.13]     | 0.84                 | 0.26                |
